# Supplementary material for: Stable G-quadruplex DNA structures promote replication-dependent genome instability
Source: PubMed Central journal article supplement — J Biol Chem. 2022 Apr 18;298(6):101947. doi: 10.1016/j.jbc.2022.101947 (PMC9142560; doi:10.1016/j.jbc.2022.101947), 2022-04-18
Supplement: mmc1.pdf [file mmc1.pdf]

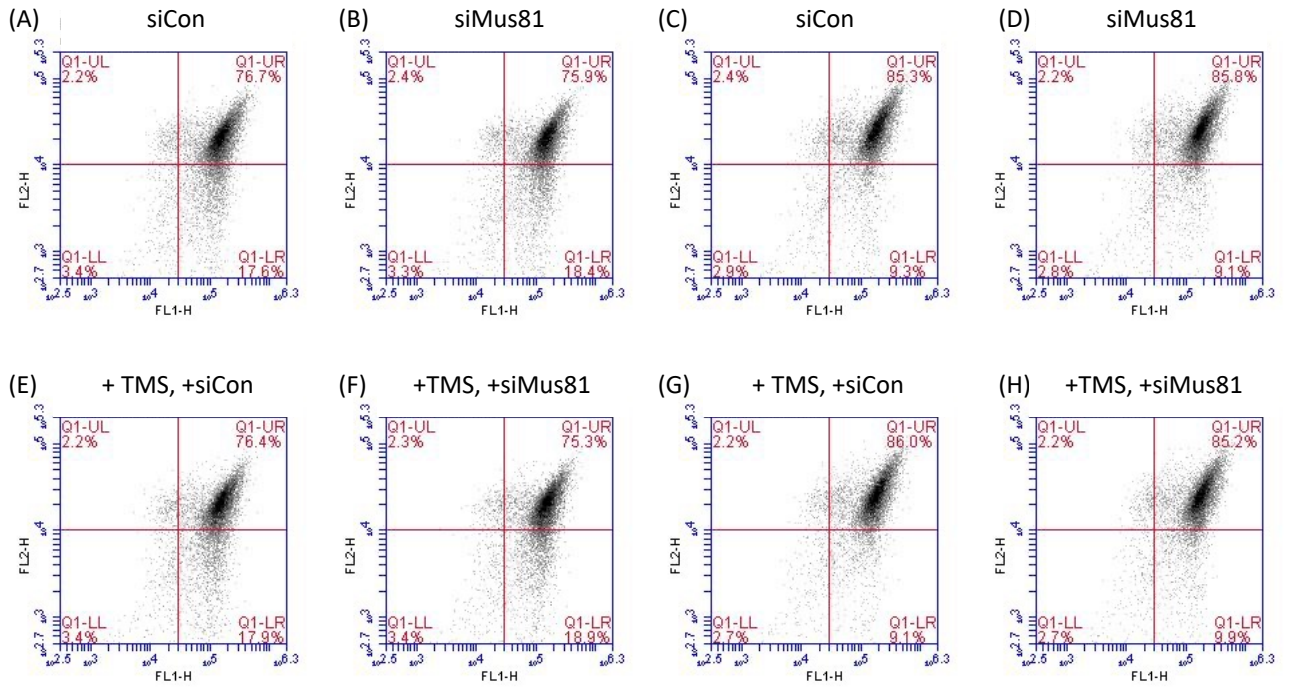

**Supplementary Figure 1. Biological replicate experiments of TMS treatment and Mus81 knockdown.** Related to Figure 2.
